# Supplementary material for: Prevalence of Alcohol Use, Sexual Risk Behavior, and HIV Among Russians in High-Risk Settings: a Systematic Review and Meta-Analysis
Source: Springer Nature journal article supplement (doi:10.1007/s12529-016-9596-1), 2016-10-11
Supplement: MOESM2 [file 10864310]

**Supplementary Material 2**

**References for manuscripts (and linked manuscripts) included in the meta-analysis.**

Abdala N, Zhan W, Shaboltas AV, Skochilov RV, Kozlov AP, Krasnoselskikh TV (2012) Efficacy of a brief HIV prevention counseling intervention among STI clinic patients in Russia: A randomized controlled trial. AIDS Behav doi:10.1007/s10461-012-0311-1

*Linked Manuscript(s):*

Abdala N, Zhan WH, Shaboltas AV, Skochilov RV, Kozlov AP, Krasnoselskikh TV (2011) Correlates of abortions and condom use among high risk women attending an STD clinic in St Petersburg, Russia. Reprod Health 8 doi:10.1186/1742-4755-8-28

Grau LE, Krasnoselskikh TV, Shaboltas AV, Skochilov RV, Kozlov AP, Abdala N (2013) Cultural adaptation of an intervention to reduce sexual risk behaviors among patients attending a STI clinic in St. Petersburg, Russia. Prev Sci doi:10.1007/s11121-012-0301-6

Zhan W, Shaboltas AV, Skochilov RV, Kozlov AP, Krasnoselskikh TV, Abdala N (2012) Depressive symptoms and unprotected sex in St. Petersburg, Russia. Journal of psychosomatic research 72(5):371-375 doi:10.1016/j.jpsychores.2012.01.015

Zhan W, Shaboltas AV, Skochilov RV, Kozlov AP, Krasnoselskikh TV, Abdala N (2012) Gender differences in the relationship between alcohol use and depressive symptoms in St. Petersburg, Russia. Journal of addiction research & therapy 3(2) doi:10.4172/2155-6105.1000124

Amirkhanian YA, et al. (2009) HIV/STD prevalence, risk behavior, and substance use patterns and predictors in Russian and Hungarian sociocentric social networks of men who have sex with men. AIDS Educ Prev 21(3):266-279

*Linked Manuscript(s):*

Amirkhanian YA, et al. (2005) A randomized social network HIV prevention trial with young men who have sex with men in Russia and Bulgaria. AIDS 19(16):1897-905

Amirkhanian YA, Kelly JA, Kabakchieva E, McAuliffe TL, Vassileva S (2003) Evaluation of a social network HIV prevention intervention program for young men who have sex with men in Russia and Bulgaria. AIDS Educ Prev 15(3):205-20

Amirkhanian YA, et al. (2006) HIV risk behaviour patterns, predictors, and sexually transmitted disease prevalence in the social networks of young men who have sex with men in St Petersburg, Russia. Int J STD AIDS 17(1):50-6 doi:10.1258/095646206775220504

Baral S, et al. (2010) Male sex workers in Moscow, Russia: a pilot study of demographics, substance use patterns, and prevalence of HIV-1 and sexually transmitted infections. AIDS Care 22(1):112-118 doi:<http://dx.doi.org/10.1080/09540120903012585>

Eritsyan KU, Levina OS, White E, Smolskaya TT, Heimer R (2013) HIV prevalence and risk behavior among injection drug users and their sex partners in two Russian cities. AIDS Res Hum Retroviruses 29(4):687-90 doi:10.1089/aid.2012.0161

*Linked Manuscript(s):*

Cepeda JA, Niccolai LM, Eritsyan K, Heimer R, Levina O (2013) Moderate/heavy alcohol use and HCV infection among injection drug users in two Russian cities. Drug Alcohol Depend 132(3):571-9 doi:10.1016/j.drugalcdep.2013.04.004

Fleming MF, et al. (2006) Alcohol and drug use disorders, HIV status and drug resistance in a sample of Russian TB patients. Int J Tuberc Lung Dis 10(5):565-570

Hoffman IF, et al. (2013) A peer-educator network HIV prevention intervention among injection drug users: results of a randomized controlled trial in St. Petersburg, Russia. AIDS Behav 17(7):2510-20 doi:10.1007/s10461-013-0563-4

*Linked Manuscript(s):*

Gyarmathy VA, et al. (2011) Unprotected sex in heterosexual partnerships of injecting drug users in St. Petersburg, Russia. AIDS Behav 15(1):58-64 doi:10.1007/s10461-010-9721-0

Iguchi MY, et al. (2009) Simultaneous recruitment of drug users and men who have sex with men in the United States and Russia using respondent-driven sampling: sampling methods and implications. J Urban Health 86 Suppl 1:5-31 doi:10.1007/s11524-009-9365-4

*Linked Manuscript(s):*

Abdala N, Hansen NB, Toussova OV, Krasnoselskikh TV, Kozlov AP, Heimer R (2012) Age at first alcoholic drink as predictor of current HIV sexual risk behaviors among a sample of injection drug users (IDUs) and non-IDUs who are sexual partners of IDUs, in St. Petersburg, Russia. AIDS Behav 16(6):1597-1604 doi:10.1007/s10461-011-0013-0

Abdala N, et al. (2013) Correlates of unprotected sexual intercourse among women who inject drugs or who have sexual partners who inject drugs in St Petersburg, Russia. J Fam Plann Reprod Health Care 39(3):179-185 doi:10.1136/jfprhc-2011-100284

Abdala N, et al. (2010) Comparing sexual risks and patterns of alcohol and drug use between injection drug users (IDUs) and non-IDUs who report sexual partnerships with IDUs in St. Petersburg, Russia. BMC Public Health 10:676 doi:10.1186/1471-2458-10-676

Grau LE, et al. (2011) HIV disclosure, condom use, and awareness of HIV infection among HIV-positive, heterosexual drug injectors in St. Petersburg, Russian Federation. AIDS Behav 15(1):45-57 doi:10.1007/s10461-010-9775-z

Niccolai LM, Shcherbakova IS, Toussova OV, Kozlov AP, Heimer R (2009) The potential for bridging of HIV transmission in the Russian Federation: sex risk behaviors and HIV prevalence among drug users (DUs) and their non-DU sex partners. J Urban Health 86(Suppl 1):131-143 doi:10.1007/s11524-009-9369-0

Niccolai LM, et al. (2011) Estimates of HIV incidence among drug users in St. Petersburg, Russia: Continued growth of a rapidly expanding epidemic. Eur J Public Health 21(5):613-9 doi:10.1093/eurpub/ckq115

Krupitsky EM, et al. (2005) Alcohol use and HIV risk behaviors among HIV-infected hospitalized patients in St. Petersburg, Russia. Drug Alcohol Depend 79(2):251-256 doi:10.1016/j.drugalcdep.2005.01.015

Krupitsky E, et al. (2004) The onset of HIV infection in the Leningrad region of Russia: A focus on drug and alcohol dependence. HIV Med 5(1):30-3

*Linked Manuscript(s):*

Krupitsky E, Zvartau E, Lioznov D, Tsoy M, Egorova V, Belyaeva T (2006) Co-morbidity of infectious and addictive diseases in St. Petersburg and the Leningrad region, Russia. Eur Addict Res 12(1):12-19

Niccolai LM, et al. (2012) Clients of street-based female sex workers and potential bridging of HIV/STI in Russia: results of a pilot study. AIDS Care 24(5):665-72 doi:10.1080/09540121.2011.630356

Odinokova V, Rusakova M, Urada LA, Silverman JG, Raj A (2014) Police sexual coercion and its association with risky sex work and substance use behaviors among female sex workers in St. Petersburg and Orenburg, Russia. Int J Drug Policy 25(1):96-104 doi:10.1016/j.drugpo.2013.06.008

Samet JH, et al. (2008) Mitigating risky sexual behaviors among Russian narcology hospital patients: The PREVENT (Partnership to Reduce the Epidemic Via Engagement in Narcology Treatment) randomized controlled trial Addiction (Abingdon, England) 103(9):1474-1483

*Linked Manuscript(s):*

Edwards EM, et al. (2008) Behavioral assessments in Russian addiction treatment inpatients: a comparison of audio computer-assisted self-interviewing and interviewer-administered questionnaires. HIV Clin Trials 9(4):247-53 doi:10.1310/hct0904-247

Raj A, et al. (2009) Binge drinking and unsafe sex: A study of narcology hospital patients from St. Petersburg, Russia. (29 refs.). Boston University, School of Public Health, Department of Social Behavioral Science, 801 Massachusetts Ave,4th Floor, Boston, MA 02118. [E-mail: anitaraj@bu.edu]

Raj A, Cheng DM, Krupitsky EM, Coleman S, Bridden C, Samet JH (2009) Correlates of Any Condom Use Among Russian Narcology Patients Reporting Recent Unprotected Sex. AIDS Behav 13(2):310-317 doi:10.1007/s10461-008-9383-3

Walley A, et al. (2008) Implications of cannabis use and heavy alcohol use on HIV drug risk behaviors in Russian heroin users. AIDS and Behavior 12:662-669

Samet JH, et al. (2015) HERMITAGE-a randomized controlled trial to reduce sexually transmitted infections and HIV risk behaviors among HIV-infected Russian drinkers. Addiction (Abingdon, England) 110(1):80-90 doi:10.1111/add.12716

*Linked Manuscript(s):*

Blokhina E, et al. (2011) Polysubstance use among HIV-infected drinkers in Russia. Eur Neuropsychopharmacol 21:S167

Edelman EJ, et al. (2015) Heroin use and HIV disease progression: Results from a pilot study of a Russian cohort. AIDS Behav 19(6):1089-1097 doi:10.1007/s10461-014-0948-z

Goodness TM, et al. (2014) Depressive symptoms and antiretroviral therapy (ART) initiation among HIV-infected Russian drinkers. AIDS Behav 18(6):1085-1093 doi:10.1007/s10461-013-0674-y

Kiriazova T, et al. (2014) Factors associated with study attrition among HIV-infected risky drinkers in St. Petersburg, Russia. HIV Clin Trials 15(3):116-25 doi:10.1310/hct1503-116

Lunze K, et al. (2013) Nondisclosure of HIV Infection to Sex Partners and Alcohol's Role: A Russian Experience. AIDS Behav 17(1):390-398 doi:<http://dx.doi.org/10.1007/s10461-012-0216-z>

Pace CA, et al. (2012) Sexually transmitted infections among HIV-infected heavy drinkers in St Petersburg, Russia. Int J STD AIDS 23(12):853-8 doi:10.1258/ijsa.2012.012004

Palfai TP, Cheng DM, Coleman SM, Bridden C, Krupitsky E, Samet JH (2014) The influence of depressive symptoms on alcohol use among HIV-infected Russian drinkers. Drug Alcohol Depend 134:85-91 doi:10.1016/j.drugalcdep.2013.09.014

Raj A, et al. (2012) Associations between partner violence perpetration and history of STI among HIV-infected substance using men in Russia. AIDS Care 25(5):646-51 doi:10.1080/09540121.2012.722188

Tsui JI, et al. (2013) Pain is associated with heroin use over time in HIV-infected Russian drinkers. Addiction (Abingdon, England) 108(10):1779-87 doi:10.1111/add.12274

Tyurina A, et al. (2013) Is cannabis use associated with HIV drug and sex risk behaviors among Russian HIV-infected risky drinkers? Drug and Alcohol Dependence:<http://dx.doi.org/10.1016/j.drugalcdep.2013.01.009>

Urada LA, et al. (2013) History of intimate partner violence is associated with sex work but not sexually transmitted infection among HIV-positive female drinkers in Russia. Int J STD AIDS 24(4):287-92 doi:10.1177/0956462412472809

Walley AY, et al. (2014) Risk factors for recent nonfatal overdose among HIV-infected Russians who inject drugs. AIDS Care 26(8):1013-1018 doi:10.1080/09540121.2013.871218

Shipitsyna E, et al. (2013) Sexual behaviours, knowledge and attitudes regarding safe sex, and prevalence of non-viral sexually transmitted infections among attendees of youth clinics in St. Petersburg, Russia. Journal of the European Academy of Dermatology and Venereology : JEADV 27(1):e75-84 doi:10.1111/j.1468-3083.2012.04512.x

Vasquez C, et al. (2013) Gender disparities in HIV risk behavior and access to health care in St. Petersburg, Russia. AIDS Patient Care STDs 27(5):304-10 doi:10.1089/apc.2013.0019 **M0457**

Zhan W, Krasnoselskikh TV, Niccolai LM, Golovanov S, Kozlov AP, Abdala N (2011a) Concurrent sexual partnerships and sexually transmitted diseases in Russia. Sex Transm Dis 38(6):543-7 doi:10.1097/OLQ.0b013e318205e449

*Linked Manuscript(s):*

Zhan W, Krasnoselskikh TV, Golovanov S, Kozlov AP, Abdala N (2012) Gap between consecutive sexual partnerships and sexually transmitted infections among STI clinic patients in St Petersburg, Russia. AIDS Behav 16(2):334-9 doi:10.1007/s10461-011-9932-z

Zhan W, Shaboltas AV, Skochilov RV, Kozlov AP, Krasnoselskikh TV, Abdala N (2011b) Alcohol misuse, drinking contexts and intimate partner violence in St. Petersburg, Russia: results from a cross-sectional study. BMC Public Health 11:629 doi:10.1186/1471-2458-11-629

*Linked Manuscript(s):*

Abdala N, et al. (2013a) Inebriation, drinking motivations and sexual risk taking among sexually transmitted disease clinic patients in St. Petersburg, Russia. AIDS Behav 17(3):1144-1150 doi:10.1007/s10461-011-0091-z

Zhan W, et al. (2012a) Partner violence perpetration and victimization and HIV risk behaviors in St. Petersburg, Russia. J Trauma Stress 25(1):86-93 doi:10.1002/jts.21658

Zhan W, Shaboltas AV, Skochilov RV, Krasnoselskikh TV, Abdala N (2013) History of childhood abuse, sensation seeking, and intimate partner violence under/not under the influence of a substance: a cross-sectional study in Russia. PloS one 8(7):e68027 doi:10.1371/journal.pone.0068027

*Linked Manuscript(s):*

Abdala N, Li F, Shaboltas AV, Skochilov RV, Krasnoselskikh TV (2016) History of childhood abuse, drinking motives, alcohol use, and sexual risk behavior among STD clinic patients in St. Petersburg, Russia: A cross-sectional study. AIDS Behav 20(3):512-522 doi:10.1007/s10461-015-1043-9
